# Supplementary material
Source: ML conference proceedings conference paper supplement (https://proceedings.mlr.press/v89/delgosha19a.html)
Supplement: Supplementary file [file delgosha19a-supp.pdf]

---

# Supplementary Material

---

**Payam Delgosha**  
 University of California, Berkeley  
 pdelgosha@eecs.berkeley.edu

**Naveen Goela**  
 Tanium, Data Science  
 ngoela@alum.mit.edu

## A Overview

This document contains supplementary material for the paper “Deep Switch Networks for Generating Discrete Data and Language” accepted to the AISTATS 2019 conference.

## B Approximate Gradient Calculation for the Two-Layer Network

In this section, we propose an approximate method to compute the gradients of the empirical likelihood of the two-layer switch network with respect to the model parameters. Recall from the main paper that in the two layer setup, the empirical log-likelihood has the following form

$$\begin{aligned} L^{(k)} &:= \frac{1}{I} \sum_{i=1}^I \log p(X_{k+1} = x_{k+1}^{(i)} | x_{[1:k]}^{(i)}; \theta^{(k)}) \\ &= \frac{1}{I} \sum_{i=1}^I \log \sum_{f_{[1:l]}^{(k)}} p(f_{[1:l]}^{(k)} | x_{[1:k]}^{(i)}; \theta_1^{(k)}) \times \\ &\quad p(X_{k+1} = x_{k+1}^{(i)} | f_{[1:l]}^{(k)}; \theta_2^{(k)}). \end{aligned} \quad (1)$$

### B.1 Likelihood Gradient

Differentiating  $L^{(k)}$  with respect to  $\theta_1^{(k)}$ , the parameters of the first layer, we get

$$\begin{aligned} \frac{\partial L^{(k)}}{\partial \theta_1^{(k)}} &= \frac{1}{I} \sum_{i=1}^I \sum_{f_{[1:l]}^{(k)}} \frac{p(x_{k+1}^{(i)} | f_{[1:l]}^{(k)}; \theta_2^{(k)}) \frac{\partial p(f_{[1:l]}^{(k)} | x_{[1:k]}^{(i)}; \theta_1^{(k)})}{\partial \theta_1^{(k)}}}{p(x_{k+1}^{(i)} | x_{[1:k]}^{(i)}; \theta^{(k)})} \\ &= \frac{1}{I} \sum_{i=1}^I \sum_{f_{[1:l]}^{(k)}} \frac{p(x_{k+1}^{(i)} | f_{[1:l]}^{(k)}; \theta_2^{(k)}) p(f_{[1:l]}^{(k)} | x_{[1:k]}^{(i)}; \theta_1^{(k)})}{p(x_{k+1}^{(i)} | x_{[1:k]}^{(i)}; \theta^{(k)})} \\ &\quad \times \frac{\partial}{\partial \theta_1^{(k)}} \log p(f_{[1:l]}^{(k)} | x_{[1:k]}^{(i)}; \theta_1^{(k)}). \end{aligned} \quad (2)$$

Note that for each  $1 \leq i \leq I$ , the inner summation over  $f_{[1:l]}^{(k)}$  could be written as an expectation with respect to the distribution  $p_i$  on  $F_{[1:l]}^{(k)}$  defined as

$$p_i(f_{[1:l]}^{(k)}; \theta^{(k)}) := \frac{p(x_{k+1}^{(i)} | f_{[1:l]}^{(k)}; \theta_2^{(k)}) p(f_{[1:l]}^{(k)} | x_{[1:k]}^{(i)}; \theta_1^{(k)})}{W_i(\theta^{(k)})},$$

with the normalizing constant

$$W_i(\theta^{(k)}) := \sum_{\tilde{f}_{[1:l]}^{(k)}} p(x_{k+1}^{(i)} | \tilde{f}_{[1:l]}^{(k)}; \theta_2^{(k)}) p(\tilde{f}_{[1:l]}^{(k)} | x_{[1:k]}^{(i)}; \theta_1^{(k)}).$$

Using this, we may write (2) as

$$\frac{\partial L^{(k)}}{\partial \theta_1^{(k)}} = \frac{1}{I} \sum_{i=1}^I \mathbb{E}_{p_i} \left[ \frac{\partial}{\partial \theta_1^{(k)}} \log p(F_{[1:l]}^{(k)} | x_{[1:k]}^{(i)}; \theta_1^{(k)}) \right], \quad (3)$$

where in the expectation, on the right hand side,  $F_{[1:l]}^{(k)}$  has the distribution  $p_i$  defined above. Similar calculation shows that

$$\frac{\partial L^{(k)}}{\partial \theta_2^{(k)}} = \frac{1}{I} \sum_{i=1}^I \mathbb{E}_{p_i} \left[ \frac{\partial}{\partial \theta_2^{(k)}} \log p(x_{k+1}^{(i)} | F_{[1:l]}^{(k)}; \theta_2^{(k)}) \right]. \quad (4)$$

### B.2 Metropolis-Hastings Algorithm

Now, we may use the Metropolis-Hastings algorithm to approximate the expectation for each  $i$ . The reason is that the ratio of probabilities  $p_i(f_{[1:l]}^{(k)}; \theta^{(k)})/p_i(\tilde{f}_{[1:l]}^{(k)}; \theta^{(k)})$  for two configurations  $f_{[1:l]}^{(k)}$  and  $\tilde{f}_{[1:l]}^{(k)}$  does not depend on the normalizing constant  $W_i(\theta^{(k)})$  and can be computed efficiently. More precisely, for  $1 \leq i \leq I$ , we design a Markov Chain Monte Carlo (MCMC) algorithm with the proposal distribution

$$g_i(\tilde{f}_{[1:l]}^{(k)} | f_{[1:l]}^{(k)}) = p(\tilde{f}_{[1:l]}^{(k)} | x_{[1:k]}^{(i)}; \theta_1^{(k)}).$$

With the current sample  $f_{[1:l]}^{(k)}$  and the new sample  $\tilde{f}_{[1:l]}^{(k)}$ , the acceptance ratio takes the following form

$$\begin{aligned} A_i(\tilde{f}_{[1:l]}^{(k)} | f_{[1:l]}^{(k)}) &= \min \left( 1, \frac{p_i(\tilde{f}_{[1:l]}^{(k)}; \theta^{(k)}) g_i(f_{[1:l]}^{(k)} | \tilde{f}_{[1:l]}^{(k)})}{p_i(f_{[1:l]}^{(k)}; \theta^{(k)}) g_i(\tilde{f}_{[1:l]}^{(k)} | f_{[1:l]}^{(k)})} \right) \\ &= \min \left( 1, \frac{p(x_{k+1}^{(i)} | \tilde{f}_{[1:l]}^{(k)}; \theta_2^{(k)})}{p(x_{k+1}^{(i)} | f_{[1:l]}^{(k)}; \theta_2^{(k)})} \right). \end{aligned}$$

We can interpret this procedure as generating samples given the previous  $k$  symbols, and then re-weight based on the likelihood of the symbol  $k + 1$ .

With this setup, we iterate the above Markov chain for  $t$  steps, and repeat this procedure for  $r$  rounds. Finally, we take the average of these independent  $r$  outcomes, where each of them is the result of a Markov chain after  $t$  iterations, to approximate each term in the gradients of (3) and (4). Figure 1 illustrates the performance of this approach for one bit in the MNIST dataset and for different values of the parameters  $r$  and  $t$ . As we can see, by increasing the values of  $r$  and  $t$ , the approximate gradient converges to the actual gradient.

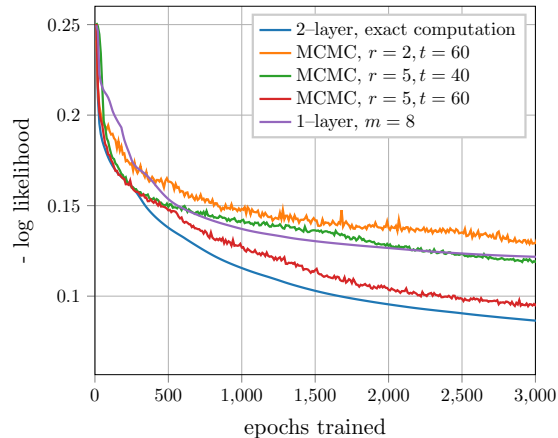

Figure 1: The performance of the MCMC algorithm for the two-layer switch network for bit index 629 of the MNIST data. The size of the switch network in this example is  $(m_1, l, m_2) = (8, 8, 4)$ . We run the Markov chain  $t$  steps for  $r$  independent runs and take the average to approximate the gradients. By increasing the values of  $r$  and  $t$ , the likelihood performance approaches that of the exact gradient computation. The performance of the single-layer switch network with  $m = 8$  is illustrated for reference.
